# Supplementary material for: Structure-based discovery of potentially active semiochemicals for Cydia pomonella (L.)
Source: PubMed Central journal article supplement (PMC5052595; doi:10.1038/srep34600), 2016-10-06
Supplement: srep34600-s1.pdf [file srep34600-s1.pdf]

**Structure-based discovery of potentially active semiochemicals for *Cydia***

***pomonella* (L.)**

***Jiyuan Liu*<sup>1,2a</sup>   *Zhen Tian*<sup>1a</sup>   *Yalin Zhang*<sup>1\*</sup>**

<sup>1</sup> Key Laboratory of Plant Protection Resources & Pest Management of the Ministry of Education, College of Plant Protection, Northwest A&F University, Yangling 712100, Shaanxi, China

<sup>2</sup> Department of Medicinal Chemistry, School of Pharmacy, Fourth Military Medical University, Xi'an 710032, Shaanxi, China

<sup>a</sup>These authors contributed equally to this work.

\*Corresponding author: Ya-Lin Zhang

Key Laboratory of Plant Protection Resources & Pest Management of the Ministry of Education, Northwest A&F University, Yangling 712100, Shaanxi, China. Tel./Fax: +86-29-8709-2190. E-mail: yalinzh@nwsuaf.edu.cn.

## **Preparations for structure-based pharmacophore modeling**

**Details for 3D model construction** The 3D structure of CpomPBP1 was built by using Modeller9.10<sup>1</sup>. Based on the crystallographic R-factor (21.8%), sequential identity (50%, Figure S1b) and pH state (pH 7.0), we finally selected the crystal structure of BmorPBP-bombykol complex from *Bombyx mori* (PDB ID: 1DQE, Chain A, resolution 1.8 Å) as the template for homology modelling. The CpomPBP1-Codlemone and CpomPBP1-ETrME complexes were constructed by molecular docking simulations using program GOLD5.3<sup>2</sup>. The 3D model of CpomPBP1 was performed 5000 steps minimization in Amber12 with ff99SB force field<sup>3</sup> before being selected as a receptor for docking simulations. The 3D structure of Codlemone was sketched using Maestro version (Schrodinger Inc.), and the 3D structure of ETrME was derived from the results of virtual screening proceeded by Ligandsout4.09<sup>4</sup>. Whole of them were optimized 2000 steps in Amber12 with GAFF force field<sup>5</sup> prior to the docking simulation. The Chemplp score implemented in GOLD was employed to finely reproduce the best binding model of these complexes since it is superior to other scoring functions in GOLD for pose prediction<sup>6</sup>. All details of the homology modeling and the molecular docking were performed according our previous reports<sup>7,8</sup>.

**Protonation states examination of CpomPBP1 model** The protonation states of CpomPBP1 model were examined by using Rosetta pKa Protocol<sup>9</sup> before we loaded the homology model of CpomPBP1 into the GOLD5.3 for molecule docking. Based on the CpomPBP1 model, we estimated the pKa values of five types of residues (Asp, Glu, His, Tyr, and Lys) in varied protonation states (Table S8). These ionizable residues, especially His35, His69, His70, His80, His95 and His123, were expected to show smaller pKa shifts compared to their theoretical intrinsic pKa (IpKa) values (set protonation with proton on Nδ1 atoms). Moreover, According to the 2D interaction diagram of CpomPBP1 with Codlemone (Figure S10), these ionizable residues were far away from Codlemone binding sites. As a result of what mentioned above, the protonation states of CpomPBP1 shed little effects on the structure-based pharmacophore modeling in this study.

## **Solvent selection for competitive binding assay**

Parts of our tested compounds are stored in ethanol (GC grade) solution, so it is necessary to check whether ethanol is advisable to be the solvent in competitive binding assay. Two

experiments were performed to evaluate the effects of ethanol on CpomPBP1 protein and CpomPBP1/1-NPN system. One was titrating 2  $\mu\text{M}$  CpomPBP1 solution with ethanol (final volume fraction ranging from 0 to 50%), This experiment suggested the effects of ethanol on CpomPBP1 protein. The other was titrating solutions containing 2  $\mu\text{M}$  CpomPBP1 and 2  $\mu\text{M}$  1-NPN with ethanol (0-32  $\mu\text{M}$ ). In the pretests, the fluorescence intensity at each point was recorded by Hitachi F-4600 spectrofluorimeter with a slit width of 5 nm for excitation and emission. For the first experiment, the excitation and emission wavelength were determined to be 250 nm and 280-380nm, respectively. For the second experiment, the excitation and emission wavelength were determined to be 370 nm and 385-500nm, respectively.

## Supplementary Tables

**Table S1** Pharmacophore-Fit Score obtained through virtual screening and the extracted 133 hits.

| <b>Entry</b> | <b>Zinc No.</b> | <b>Source Database</b> | <b>Pharmacophore-Fit Score</b> |
|--------------|-----------------|------------------------|--------------------------------|
| 1            | ZINC39381666    | semiochemicals.ldb     | 47.71                          |
| 2            | ZINC13508540    | semiochemicals.ldb     | 47.52                          |
| 3            | ZINC83314692    | semiochemicals.ldb     | 47.51                          |
| 4            | ZINC83314700    | semiochemicals.ldb     | 47.50                          |
| 5            | ZINC83314696    | semiochemicals.ldb     | 47.48                          |
| 6            | ZINC83314697    | semiochemicals.ldb     | 47.26                          |
| 7            | ZINC04521470    | semiochemicals.ldb     | 47.24                          |
| 8            | ZINC27643568    | semiochemicals.ldb     | 47.21                          |
| 9            | ZINC83316818    | semiochemicals.ldb     | 47.20                          |
| 10           | ZINC31261530    | semiochemicals.ldb     | 47.19                          |
| 11           | ZINC12496534    | semiochemicals.ldb     | 47.19                          |
| 12           | ZINC12495672    | semiochemicals.ldb     | 47.19                          |
| 13           | ZINC27646426    | semiochemicals.ldb     | 47.18                          |
| 14           | ZINC64858257    | semiochemicals.ldb     | 47.15                          |
| 15           | ZINC08860491    | semiochemicals.ldb     | 47.11                          |
| 16           | ZINC64220083    | semiochemicals.ldb     | 47.10                          |
| 17           | ZINC13507101    | semiochemicals.ldb     | 47.10                          |
| 18           | ZINC12495497    | semiochemicals.ldb     | 47.10                          |
| 19           | ZINC33820499    | semiochemicals.ldb     | 47.07                          |
| 20           | ZINC83314695    | semiochemicals.ldb     | 47.06                          |
| 21           | ZINC27643574    | semiochemicals.ldb     | 47.06                          |
| 22           | ZINC27645640    | semiochemicals.ldb     | 47.03                          |
| 23           | ZINC04543843    | semiochemicals.ldb     | 47.03                          |
| 24           | ZINC03630789    | semiochemicals.ldb     | 47.02                          |
| 25           | ZINC33822158    | semiochemicals.ldb     | 46.98                          |
| 26           | ZINC33954700    | semiochemicals.ldb     | 46.96                          |
| 27           | ZINC27643447    | semiochemicals.ldb     | 46.96                          |
| 28           | ZINC64219875    | semiochemicals.ldb     | 46.95                          |
| 29           | ZINC12495502    | semiochemicals.ldb     | 46.93                          |
| 30           | ZINC04655401    | semiochemicals.ldb     | 46.93                          |
| 31           | ZINC64859078    | semiochemicals.ldb     | 46.9                           |
| 32           | ZINC13508536    | semiochemicals.ldb     | 46.89                          |
| 33           | ZINC90427610    | semiochemicals.ldb     | 46.88                          |
| 34           | ZINC33822158    | semiochemicals.ldb     | 46.88                          |
| 35           | ZINC40164570    | semiochemicals.ldb     | 46.86                          |
| 36           | ZINC34961834    | semiochemicals.ldb     | 46.86                          |
| 37           | ZINC90427607    | semiochemicals.ldb     | 46.85                          |
| 38           | ZINC27643454    | semiochemicals.ldb     | 46.85                          |
| 39           | ZINC27644605    | semiochemicals.ldb     | 46.82                          |
| 40           | ZINC04544257    | semiochemicals.ldb     | 46.80                          |

---

|    |              |                    |       |
|----|--------------|--------------------|-------|
| 41 | ZINC03802189 | semiochemicals.ldb | 46.78 |
| 42 | ZINC26578389 | semiochemicals.ldb | 46.74 |
| 43 | ZINC64858252 | semiochemicals.ldb | 46.72 |
| 44 | ZINC44608726 | semiochemicals.ldb | 46.72 |
| 45 | ZINC02139103 | semiochemicals.ldb | 46.72 |
| 46 | ZINC31333928 | semiochemicals.ldb | 46.70 |
| 47 | ZINC08860470 | semiochemicals.ldb | 46.69 |
| 48 | ZINC31983243 | semiochemicals.ldb | 46.68 |
| 49 | ZINC64219883 | semiochemicals.ldb | 46.67 |
| 50 | ZINC04543724 | semiochemicals.ldb | 46.67 |
| 51 | ZINC64858254 | semiochemicals.ldb | 46.66 |
| 52 | ZINC02040077 | semiochemicals.ldb | 46.65 |
| 53 | ZINC64219881 | semiochemicals.ldb | 46.59 |
| 54 | ZINC83316820 | semiochemicals.ldb | 46.58 |
| 55 | ZINC14984556 | semiochemicals.ldb | 46.58 |
| 56 | ZINC30730667 | semiochemicals.ldb | 46.51 |
| 57 | ZINC27644415 | semiochemicals.ldb | 46.51 |
| 58 | ZINC27643501 | semiochemicals.ldb | 46.49 |
| 59 | ZINC83314732 | semiochemicals.ldb | 46.47 |
| 60 | ZINC64219882 | semiochemicals.ldb | 46.46 |
| 61 | ZINC03777423 | semiochemicals.ldb | 46.46 |
| 62 | ZINC05761860 | semiochemicals.ldb | 46.45 |
| 63 | ZINC64219870 | semiochemicals.ldb | 46.44 |
| 64 | ZINC83316817 | semiochemicals.ldb | 46.41 |
| 65 | ZINC31261534 | semiochemicals.ldb | 46.41 |
| 66 | ZINC27643561 | semiochemicals.ldb | 46.40 |
| 67 | ZINC14494726 | semiochemicals.ldb | 46.40 |
| 68 | ZINC12504490 | semiochemicals.ldb | 46.40 |
| 69 | ZINC04655397 | semiochemicals.ldb | 46.39 |
| 70 | ZINC14616296 | semiochemicals.ldb | 46.38 |
| 71 | ZINC90372639 | semiochemicals.ldb | 46.37 |
| 72 | ZINC33953561 | semiochemicals.ldb | 46.36 |
| 73 | ZINC04655400 | semiochemicals.ldb | 46.35 |
| 74 | ZINC64220091 | semiochemicals.ldb | 46.34 |
| 75 | ZINC13543118 | semiochemicals.ldb | 46.34 |
| 76 | ZINC12496042 | semiochemicals.ldb | 46.34 |
| 77 | ZINC90372641 | semiochemicals.ldb | 46.32 |
| 78 | ZINC33822144 | semiochemicals.ldb | 46.28 |
| 79 | ZINC15273980 | semiochemicals.ldb | 46.24 |
| 80 | ZINC04528924 | semiochemicals.ldb | 46.22 |
| 81 | ZINC90372638 | semiochemicals.ldb | 46.19 |
| 82 | ZINC30730644 | semiochemicals.ldb | 46.19 |
| 83 | ZINC12496917 | semiochemicals.ldb | 46.16 |
| 84 | ZINC26578301 | semiochemicals.ldb | 46.14 |

---

---

|     |              |                    |       |
|-----|--------------|--------------------|-------|
| 85  | ZINC90427606 | semiochemicals.ldb | 46.13 |
| 86  | ZINC83314698 | semiochemicals.ldb | 46.13 |
| 87  | ZINC05964866 | semiochemicals.ldb | 46.13 |
| 88  | ZINC27643554 | semiochemicals.ldb | 46.12 |
| 89  | ZINC08860439 | semiochemicals.ldb | 46.12 |
| 90  | ZINC03871295 | semiochemicals.ldb | 46.12 |
| 91  | ZINC64219873 | semiochemicals.ldb | 46.11 |
| 92  | ZINC13516216 | semiochemicals.ldb | 46.09 |
| 93  | ZINC64219888 | semiochemicals.ldb | 46.07 |
| 94  | ZINC31333933 | semiochemicals.ldb | 46.07 |
| 95  | ZINC27643443 | semiochemicals.ldb | 46.07 |
| 96  | ZINC33838356 | semiochemicals.ldb | 46.02 |
| 97  | ZINC27643057 | semiochemicals.ldb | 46.01 |
| 98  | ZINC83314702 | semiochemicals.ldb | 45.97 |
| 99  | ZINC64858265 | semiochemicals.ldb | 45.97 |
| 100 | ZINC13543119 | semiochemicals.ldb | 45.94 |
| 101 | ZINC27643481 | semiochemicals.ldb | 45.91 |
| 102 | ZINC83316566 | semiochemicals.ldb | 45.89 |
| 103 | ZINC14616300 | semiochemicals.ldb | 45.89 |
| 104 | ZINC08860471 | semiochemicals.ldb | 45.88 |
| 105 | ZINC27643488 | semiochemicals.ldb | 45.82 |
| 106 | ZINC13508538 | semiochemicals.ldb | 45.81 |
| 107 | ZINC83316749 | semiochemicals.ldb | 45.8  |
| 108 | ZINC04474613 | semiochemicals.ldb | 45.78 |
| 109 | ZINC13507528 | semiochemicals.ldb | 45.77 |
| 110 | ZINC27643494 | semiochemicals.ldb | 45.74 |
| 111 | ZINC34961865 | semiochemicals.ldb | 45.72 |
| 112 | ZINC34022433 | semiochemicals.ldb | 45.72 |
| 113 | ZINC13551720 | semiochemicals.ldb | 45.7  |
| 114 | ZINC05510392 | semiochemicals.ldb | 45.69 |
| 115 | ZINC83314689 | semiochemicals.ldb | 45.64 |
| 116 | ZINC05417126 | semiochemicals.ldb | 45.64 |
| 117 | ZINC33953352 | semiochemicals.ldb | 45.63 |
| 118 | ZINC14494723 | semiochemicals.ldb | 45.61 |
| 119 | ZINC05510380 | semiochemicals.ldb | 45.59 |
| 120 | ZINC90372640 | semiochemicals.ldb | 45.58 |
| 121 | ZINC59383589 | semiochemicals.ldb | 45.56 |
| 122 | ZINC33822120 | semiochemicals.ldb | 45.56 |
| 123 | ZINC04556502 | semiochemicals.ldb | 45.54 |
| 124 | ZINC05510396 | semiochemicals.ldb | 45.53 |
| 125 | ZINC08860440 | semiochemicals.ldb | 45.47 |
| 126 | ZINC12493948 | semiochemicals.ldb | 45.42 |
| 127 | ZINC83314729 | semiochemicals.ldb | 45.37 |
| 128 | ZINC33820296 | semiochemicals.ldb | 45.37 |

---

---

|     |              |                    |       |
|-----|--------------|--------------------|-------|
| 129 | ZINC70776987 | semiochemicals.ldb | 45.27 |
| 130 | ZINC70774858 | semiochemicals.ldb | 45.20 |
| 131 | ZINC33611444 | semiochemicals.ldb | 44.71 |
| 132 | ZINC33611443 | semiochemicals.ldb | 44.69 |
| 133 | ZINC33611445 | semiochemicals.ldb | 44.68 |

---

**Table S2** Gaussian Shape Similarity Score obtained based on shape alignment and the extracted 31 hits.

| <b>Entry</b> | <b>Zinc No.</b> | <b>Pharmacophore-Fit Score</b> | <b>Gaussian Shape Similarity Score</b> |
|--------------|-----------------|--------------------------------|----------------------------------------|
| 1            | ZINC83316566    | 45.89                          | 0.67234                                |
| 2            | ZINC83314700    | 47.5                           | 0.64463                                |
| 3            | ZINC15273980    | 46.24                          | 0.63166                                |
| 4            | ZINC27643501    | 46.49                          | 0.62931                                |
| 5            | ZINC04655401    | 46.93                          | 0.62170                                |
| 6            | ZINC83314697    | 46.64                          | 0.62103                                |
| 7            | ZINC03630789    | 47.02                          | 0.62072                                |
| 8            | ZINC83316818    | 47.2                           | 0.60465                                |
| 9            | ZINC27643568    | 47.21                          | 0.60282                                |
| 10           | ZINC27643488    | 45.72                          | 0.59936                                |
| 11           | ZINC13508540    | 47.52                          | 0.59149                                |
| 12           | ZINC83314696    | 47.35                          | 0.58634                                |
| 13           | ZINC34961865    | 45.56                          | 0.58551                                |
| 14           | ZINC05964866    | 46.13                          | 0.58093                                |
| 15           | ZINC04474613    | 45.78                          | 0.57441                                |
| 16           | ZINC03871295    | 46.12                          | 0.56778                                |
| 17           | ZINC64858254    | 46.35                          | 0.56712                                |
| 18           | ZINC27643554    | 46.12                          | 0.56462                                |
| 19           | ZINC83314695    | 46.76                          | 0.55472                                |
| 20           | ZINC83316817    | 46.32                          | 0.55096                                |
| 21           | ZINC40164570    | 46.86                          | 0.54915                                |
| 22           | ZINC13508536    | 46.89                          | 0.54795                                |
| 23           | ZINC31333928    | 46.7                           | 0.54648                                |
| 24           | ZINC83314698    | 46.13                          | 0.54516                                |
| 25           | ZINC33822158    | 46.88                          | 0.54419                                |
| 26           | ZINC04655400    | 46.35                          | 0.54101                                |
| 27           | ZINC13551720    | 45.7                           | 0.53500                                |
| 28           | ZINC31983243    | 46.68                          | 0.53477                                |
| 29           | ZINC12496534    | 47.19                          | 0.52698                                |
| 30           | ZINC13507101    | 47.1                           | 0.52582                                |
| 31           | ZINC30730667    | 46.51                          | 0.52548                                |



**Table S3** Binding affinity calculation results and the extracted 18 hits.

| <b>Entry</b> | <b>Name</b>  | <b>Gaussian Shape<br/>Similarity Score</b> | <b>Pharmacophore-Fit<br/>Score</b> | <b>Binding Affinity<br/>Score</b> |
|--------------|--------------|--------------------------------------------|------------------------------------|-----------------------------------|
| 1            | ZINC13508536 | 0.54795                                    | 46.89                              | -35.99                            |
| 2            | ZINC31983243 | 0.53477                                    | 46.68                              | -35.17                            |
| 3            | ZINC83314697 | 0.62103                                    | 46.64                              | -35.05                            |
| 4            | ZINC27643501 | 0.62931                                    | 46.49                              | -35.00                            |
| 5            | ZINC13551720 | 0.535                                      | 45.7                               | -34.83                            |
| 6            | ZINC03630789 | 0.62072                                    | 47.02                              | -34.62                            |
| 7            | ZINC33822158 | 0.54419                                    | 46.88                              | -34.49                            |
| 8            | ZINC83314698 | 0.54516                                    | 46.13                              | -34.29                            |
| 9            | ZINC30730667 | 0.52548                                    | 46.51                              | -34.18                            |
| 10           | ZINC83316818 | 0.60465                                    | 47.2                               | -33.65                            |
| 11           | ZINC13508540 | 0.59149                                    | 47.52                              | -33.48                            |
| 12           | ZINC13507101 | 0.52582                                    | 47.1                               | -33.48                            |
| 13           | ZINC83314700 | 0.56307                                    | 46.15                              | -33.40                            |
| 14           | ZINC83316566 | 0.67234                                    | 45.89                              | -32.95                            |
| 15           | ZINC83316817 | 0.55096                                    | 46.32                              | -32.90                            |
| 16           | ZINC04474613 | 0.57441                                    | 45.78                              | -32.52                            |
| 17           | ZINC83314696 | 0.58634                                    | 47.35                              | -32.46                            |
| 18           | ZINC12496534 | 0.52698                                    | 47.19                              | -30.79                            |

**Table S4** Physical properties prediction of 4 hit compounds and Codlemone.

| Compound         | Physical state | Boiling Point <sup>a</sup> | Vapor Pressure <sup>b</sup> | Enthalpy of Vaporization <sup>c</sup><br>(kcal/mol) |
|------------------|----------------|----------------------------|-----------------------------|-----------------------------------------------------|
| <i>ETrME</i>     | liquid         | 398.55 ±11.00              | -5.84 ±0.92                 | 15.51                                               |
| <i>Codlemone</i> | liquid         | 270.68 ±9.00               | -3.05 ±1.24                 | 14.12                                               |
| ZINC27643501     | liquid         | 388.18 ±11.00              | -6.38 ±1.90                 | 16.72                                               |
| ZINC12496534     | -              | 488.04 ±45.00              | 0.00 ±2.80                  | 20.76                                               |
| ZINC13507101     | -              | 437.98 ±24.00              | -8.17 ±2.26                 | 18.21                                               |

<sup>a</sup> Calculated boiling point value at 101.325 kPa pressure.

<sup>b</sup> Saturated vapor pressure prediction of compounds in the closed equilibrium system at the temperature of 25 Celsius. Vapor pressure prediction is converted into a logarithmic scale.

<sup>c</sup> Calculated enthalpy of vaporization indicates the amount of energy needed to vaporize a given quantity of analyzed compound under the atmospheric pressure.

**Table S5** Cluster analysis of CpomPBP1-ETrME complex based on the MD simulations trajectory<sup>a</sup>.

| Cluster | Occurrence<br>[%] | RMSD [Å]   |
|---------|-------------------|------------|
|         |                   | To Docking |
| 1       | 2.3               | 1.40       |
| 2       | 6.2               | 1.25       |
| 3       | 6.5               | 1.33       |
| 4       | 37.1              | 1.23       |
| 5       | 47.8              | 1.13       |

<sup>a</sup> The five structural clusters appear consecutively during the 75 ns MD simulations. RMSD represents the conformational variations between clusters and docking structure.

**Table S6** Decomposition of binding free energy on a per-residue level <sup>a</sup>

| <b>Residue</b> | <b>S<sub>VDW</sub></b> | <b>B<sub>VDW</sub></b> | <b>T<sub>VDW</sub></b> | <b>S<sub>ELE</sub></b> | <b>B<sub>ELE</sub></b> | <b>T<sub>ELE</sub></b> | <b>S<sub>EPB</sub></b> | <b>B<sub>EPB</sub></b> | <b>T<sub>EPB</sub></b> | <b>S<sub>TOT</sub></b> | <b>B<sub>TOT</sub></b> | <b>T<sub>TOT</sub></b> |
|----------------|------------------------|------------------------|------------------------|------------------------|------------------------|------------------------|------------------------|------------------------|------------------------|------------------------|------------------------|------------------------|
| Phe12          | -2.418                 | -0.218                 | -2.636                 | -0.124                 | -0.012                 | -0.136                 | 1.228                  | 0.030                  | 1.259                  | -1.313                 | -0.200                 | -1.513                 |
| Phe36          | -1.922                 | -0.204                 | -2.126                 | -0.128                 | -0.011                 | -0.139                 | 1.007                  | -0.031                 | 0.976                  | -1.043                 | -0.247                 | -1.289                 |
| Trp37          | -1.481                 | -0.104                 | -1.584                 | -1.614                 | 0.002                  | -1.612                 | 1.638                  | 0.103                  | 1.741                  | -1.456                 | 0.001                  | -1.455                 |
| Ile52          | -1.138                 | -0.272                 | -1.409                 | 0.040                  | -0.042                 | -0.002                 | 0.084                  | 0.407                  | 0.491                  | -1.014                 | 0.093                  | -0.920                 |
| Ile94          | -1.274                 | -0.190                 | -1.465                 | -0.019                 | -0.019                 | -0.038                 | 0.013                  | 0.086                  | 0.099                  | -1.280                 | -0.124                 | -1.404                 |
| Ser9           | -0.634                 | -0.853                 | -1.488                 | -0.117                 | -0.186                 | -0.303                 | 1.256                  | 0.712                  | 1.968                  | 1.256                  | -0.327                 | 0.177                  |
| Phe33          | -0.914                 | -0.194                 | -1.11                  | 0.050                  | -0.084                 | -0.034                 | 0.808                  | 1.122                  | 1.930                  | -0.057                 | 0.844                  | 0.787                  |
| Ser56          | -0.472                 | -0.157                 | -0.629                 | -0.036                 | 0.011                  | -0.024                 | 1.907                  | -0.000                 | 1.907                  | 1.400                  | -0.147                 | 1.254                  |

<sup>a</sup> Energies shown as contributions of sidechain atoms (S), backbone atoms (B), and the total (T).

Each item is subdivided into van der Waals energy (VDW), electrostatic energy (ELE), polar solvation energy (EPB). TOT represents the total energy contribution of each item. All values are given in kcal/mol.

**Table S7** H-bond interactions between ETrME and CpomPBP1 during whole MD simulations<sup>a</sup>.

| <b>DONOR</b> |           | <b>ACCEPTORH</b> |           | <b>ACCEPTOR</b> |           |           |              |               |
|--------------|-----------|------------------|-----------|-----------------|-----------|-----------|--------------|---------------|
| atom#        | :res@atom | atom#            | :res@atom | atom#           | :res@atom | %occupied | distance     | angle         |
| 2302         | :146@O21  | 567              | :37@HE1   | 566             | :37@NE1   | 74.84     | 2.93 ( 0.17) | 30.72 (12.85) |

<sup>a</sup> The percentage of simulation snapshots (saved every 10 p sec) in which the H-bond was present is listed. The occupancy of H-bonds larger than 5% is listed.

**Table S8** Calculation of pKa values for all ionizable residues<sup>a</sup> in CpomPBP1 structure.

| Residue Number | IpKa <sup>b</sup> | pKa  | Method <sup>c</sup> |
|----------------|-------------------|------|---------------------|
| GLU 2          | 4.4               | 5.7  | N                   |
| ASP 7          | 4                 | 3.9  | N                   |
| LYS 14         | 10.4              | 10.5 | N                   |
| ASP 17         | 4                 | 3.9  | N                   |
| GLU 18         | 4.4               | 3.8  | N                   |
| LYS 20         | 10.4              | 10.9 | N                   |
| LYS 21         | 10.4              | 10.4 | N                   |
| ASP 22         | 4                 | 4    | N                   |
| GLU 23         | 4.4               | 4.6  | N                   |
| ASP 27         | 4                 | 3.1  | N                   |
| ASP 32         | 4                 | 1    | N                   |
| HIS 35         | 6.3               | 6    | N                   |
| LYS 38         | 10.4              | 10.3 | N                   |
| GLU 39         | 4.4               | 4.4  | N                   |
| ASP 40         | 4                 | 3.6  | N                   |
| TYR 41         | 10                | 10   | N                   |
| LYS 57         | 10.4              | 10.3 | N                   |
| LYS 58         | 10.4              | 11.8 | N                   |
| GLU 60         | 4.4               | 4.6  | N                   |
| ASP 63         | 4                 | 3.3  | N                   |
| ASP 65         | 4                 | 5.1  | N                   |
| GLU 67         | 4.4               | 5.1  | N                   |
| HIS 69         | 6.3               | 4.3  | N                   |
| HIS 70         | 6.3               | 5.9  | N                   |
| LYS 74         | 10.4              | 10   | N                   |
| GLU 75         | 4.4               | 4.8  | N                   |
| LYS 79         | 10.4              | 10.4 | N                   |
| HIS 80         | 6.3               | 5    | P                   |
| ASP 83         | 4                 | 3    | N                   |
| GLU 84         | 4.4               | 4.4  | N                   |
| GLU 85         | 4.4               | 5.6  | N                   |
| ASP 89         | 4                 | 4.1  | N                   |
| HIS 95         | 6.3               | 6.4  | N                   |
| ASP 96         | 4                 | 3.7  | N                   |
| ASP 105        | 4                 | 3.7  | N                   |
| ASP 106        | 4                 | 2.9  | N                   |
| LYS 110        | 10.4              | 10   | N                   |
| GLU 113        | 4.4               | 3.8  | N                   |
| LYS 116        | 10.6              | 11.3 | N                   |
| LYS 119        | 10.4              | 11.4 | N                   |
| GLU 121        | 4.4               | 4    | N                   |
| HIS 123        | 6.3               | 6.1  | N                   |

|         |      |      |   |
|---------|------|------|---|
| LYS 124 | 10.4 | 11   | N |
| LYS 125 | 10.4 | 10.5 | N |
| GLU 132 | 4.4  | 4.5  | N |
| GLU 137 | 4.4  | 4.3  | N |
| GLU 141 | 4.4  | 5.1  | N |

<sup>a</sup> All ionizable residues in CpomPBP1 were categorized into five types of Asp, Glu, His, Tyr and Lys.

<sup>b</sup> IpKa represents the theoretical intrinsic pKa values. Ionizable residues buried in the core of the protein and near enzyme catalytic sites are expected to show higher pKa shifts compared to the residues on the protein surface exposed to the solvent.

<sup>c</sup> Methods: S: Site Repack; N: Neighbor Repack; P: Prepack Complete Structure.

## Supplementary Figure Legends

**Figure S1** Structure of CpomPBP1. (a) 3D model of CpomPBP1. The six  $\alpha$ -helices are marked by  $\alpha 1$  to  $\alpha 6$ , C and N represent C-terminus and N-terminus, respectively. (b) Amino acid sequences alignment between BmorPBP from *Bombyx mori* and CpomPBP1. 1DQE\_A stands for BmorPBP.

**Figure S2** Interaction energy map between CpomPBP1 (in the binding site region) and probe. The golden (a) and slate blue (b) points indicate areas of favorable interaction energy with hydroxyl and CMET probes (energy threshold set to -18.9 and 18.1KJ/mol, respectively). Codlemone was overlaid for comparison, but removed before computing the interaction energy map.

**Figure S3** The effects of ethanol on CpomPBP1 (a) and CpomPBP1-1-NPN system (b).  $F_0$  is the intrinsic fluorescence intensity of CpomPBP1 without ethanol,  $F_m$  is the intrinsic fluorescence intensity of CpomPBP1 at a given ethanol concentration.

**Figure S4** Binding curves of tested ligands to CpomPBP1. These ligands including C20:3n-6,8,12 (a), OTrE (b) and Linoleic acid (c) exhibited no binding to CpomPBP1.

**Figure S5** Molecular dynamic analysis of CpomPBP1-ETrME complex. (a) RMSD value for the whole backbone of atoms from CpomPBP1-ETrME complex, (b) RMSD of ETrME relative to the starting structure during the production phase of MD simulations. (c) Average fluctuations of residues from CpomPBP1 in the whole process of 75 ns MD simulations.

**Figure S6** Superimposing the best MD representative conformations of ETrME and key residues in the active pocket of CpomPBP1 on the counterparts of docking structure. In green, the best MD representative conformation; in gray, the conformations of docking structure. ETrME is presented with stick-and-sphere model. Key residues including Phe12, Phe36 and Trp37 are presented with stick model. Red dashed line is the H bond.

**Figure S7** The distances of key interactions in CpomPBP1-ETrME complex. (a) The best MD (molecular dynamic) representative structure of CpomPBP1-ETrME complex. ETrME and key residues including Phe12, Phe36 and Trp37 are presented in green and gray stick-and-sphere model, respectively. Black, red and green dashed lines represent the average distances of key interactions. (b) The distances of atoms forming key interactions along the whole MD simulation time. Corresponding atoms are marked in (a).

**Figure S8** Residue-ligand interaction spectrum of the CpomPBP1-ETrME according to the MM-PBSA method. The x-axis denotes the residue number of CpomPBP1 and the y-axis denotes



the sidechain energy contribution of each residue.

**Figure S9** Site-directed mutation of CpomPBP1. (a) The site-directed mutation of CpomPBP1 gene. (b) The mutant and wild types of CpomPBP1 protein. F12A, F36A, W37A, I52A and I94A are abbreviations for CpomPBP1F12A, CpomPBP1F36A, CpomPBP1W37A, CpomPBP1I52A and CpomPBP1I94A. WT stands for wildtype CpomPBP1.

**Figure S10** The interaction diagram of CpomPBP1 with ETrME. Only van der waals (light green) and hydrogen bond (green) interactions were detected around the binding sites of CpomPBP1.

Figure S1

a

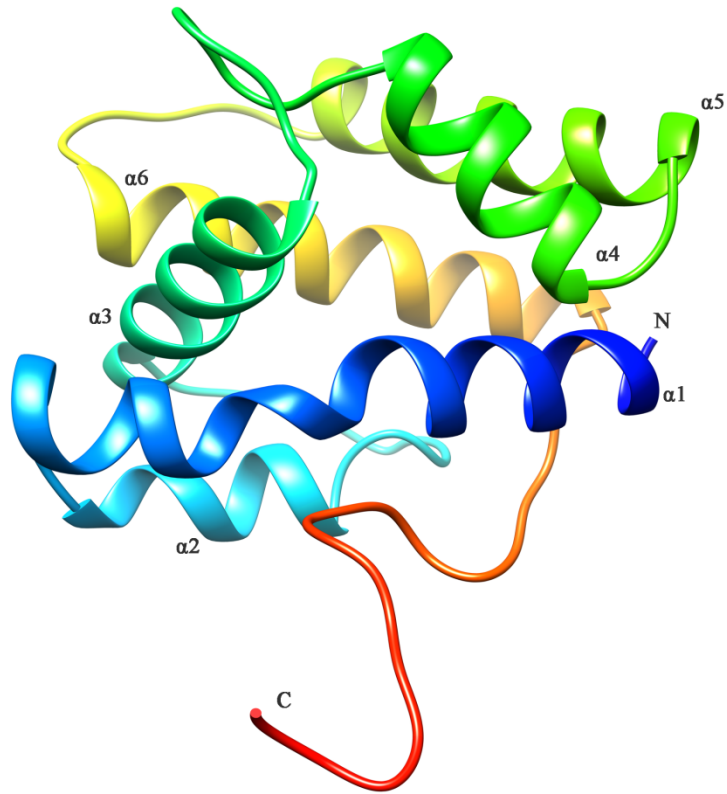

b

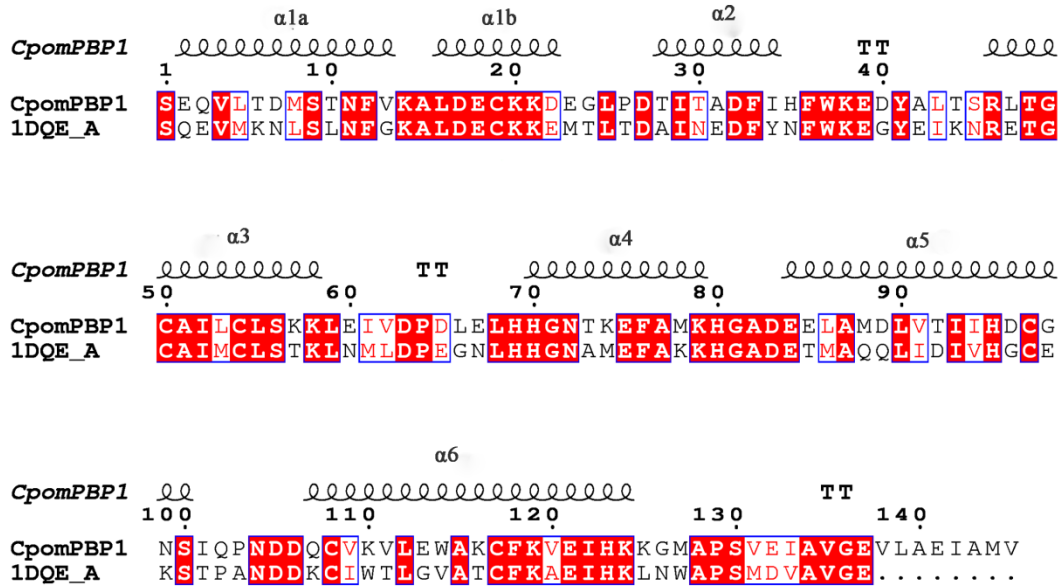

**Figure S2**

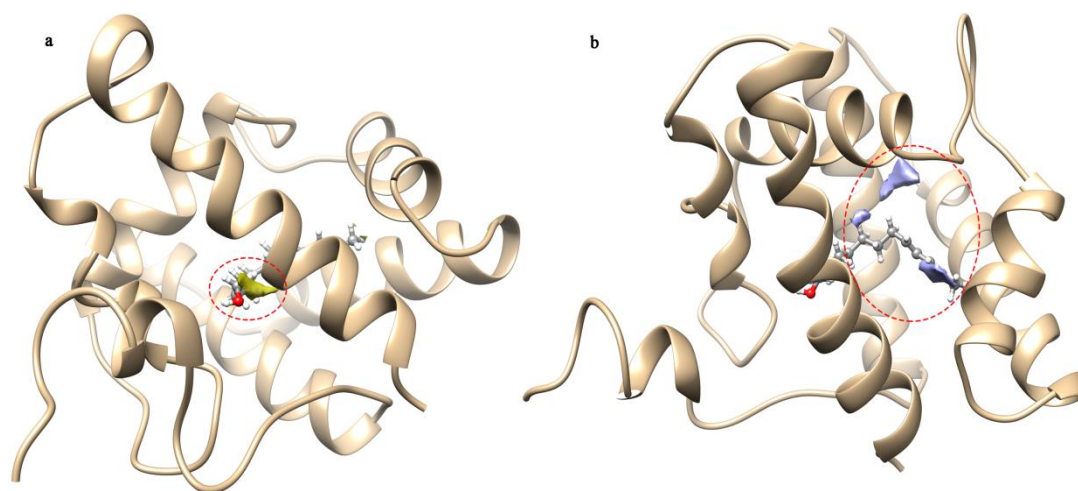

**Figure S3**

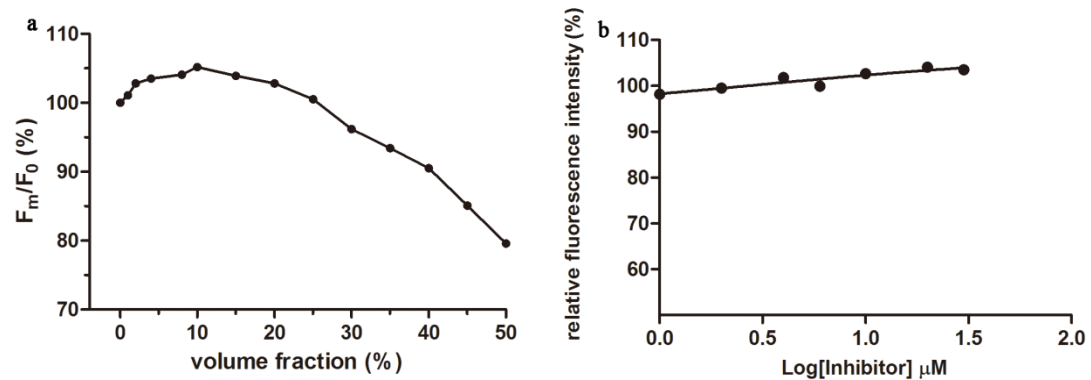

Figure S4

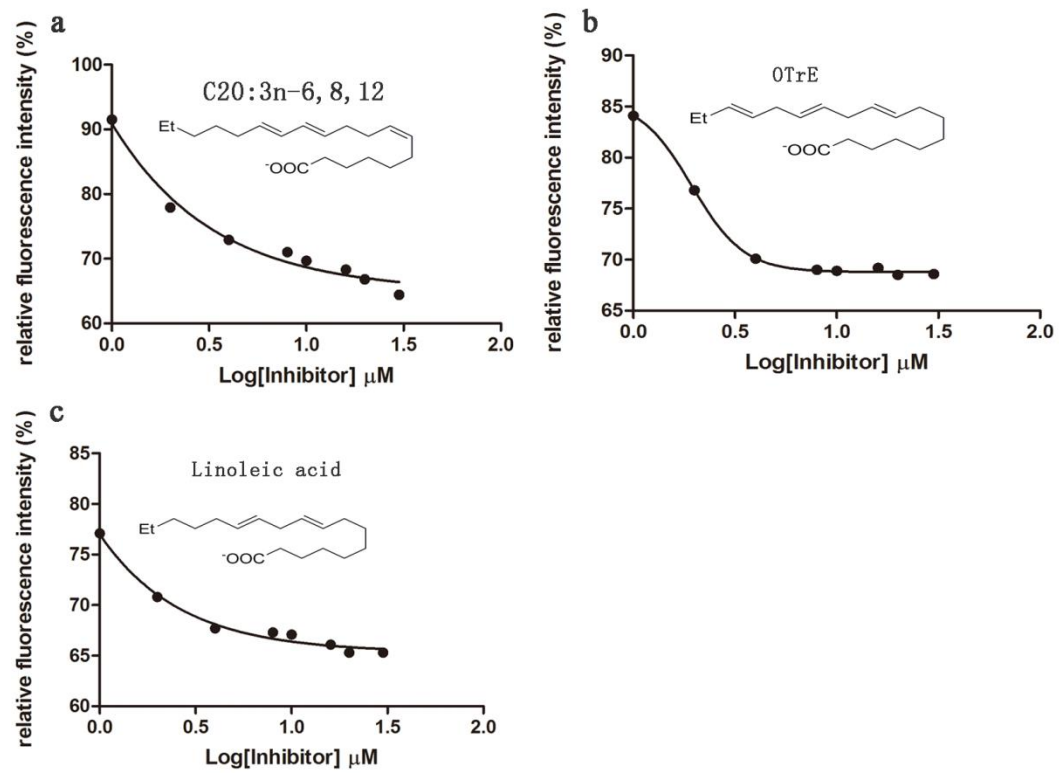

Figure S5

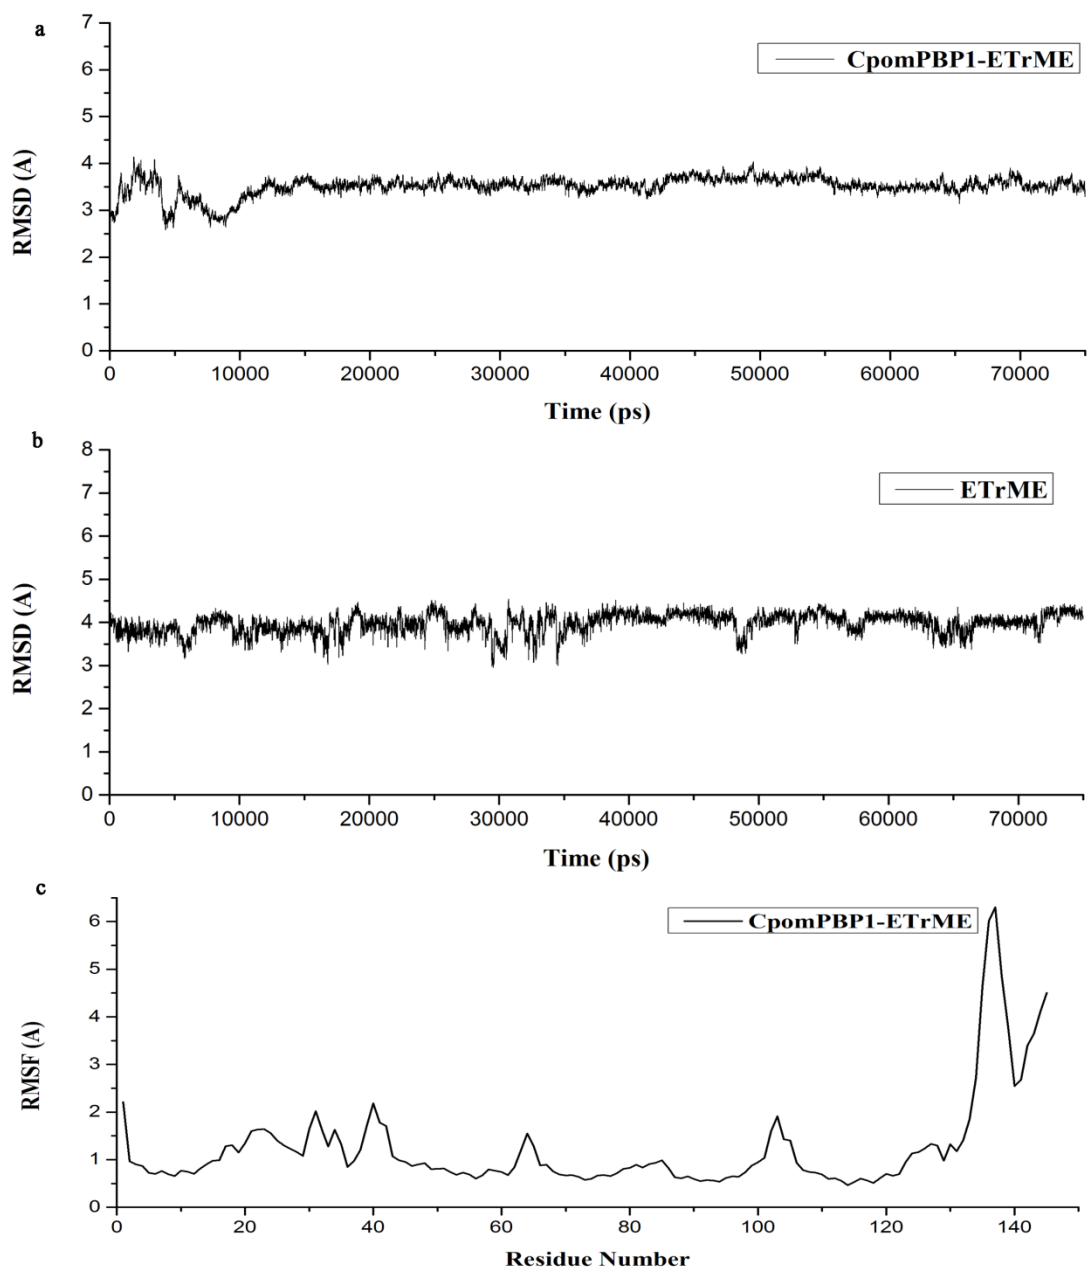

**Figure S6**

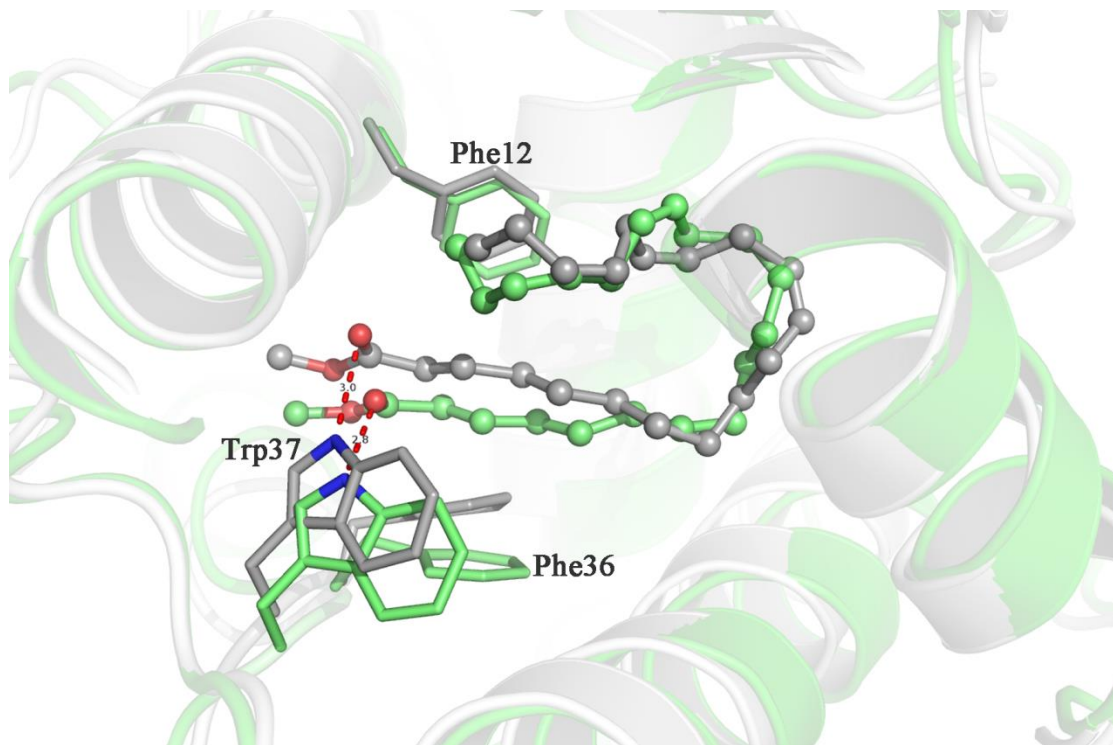

Figure S7

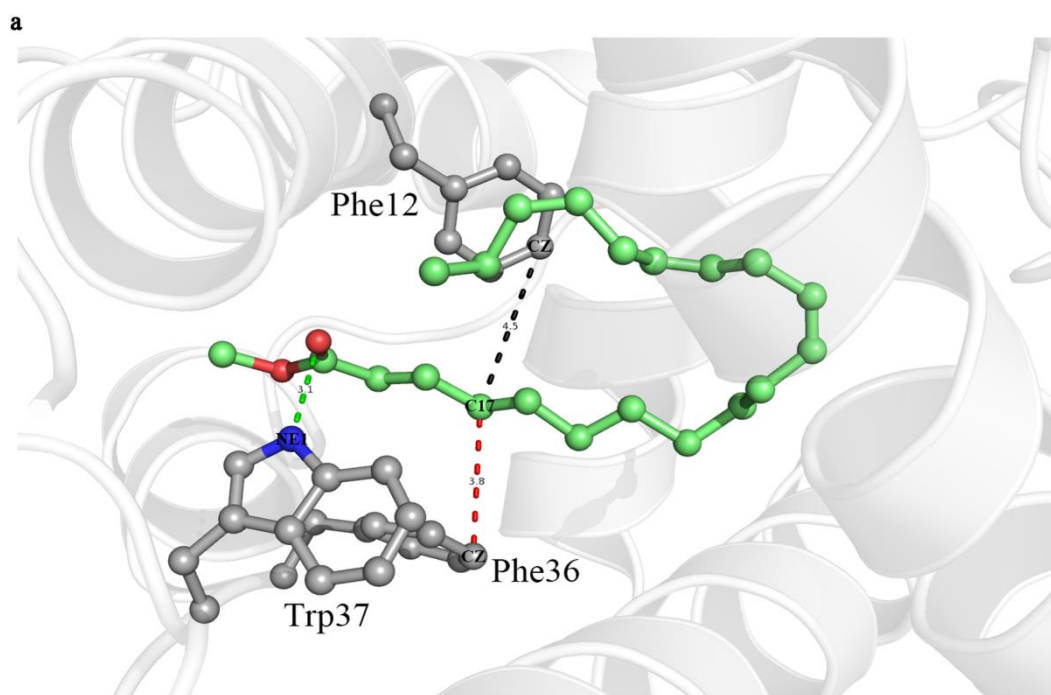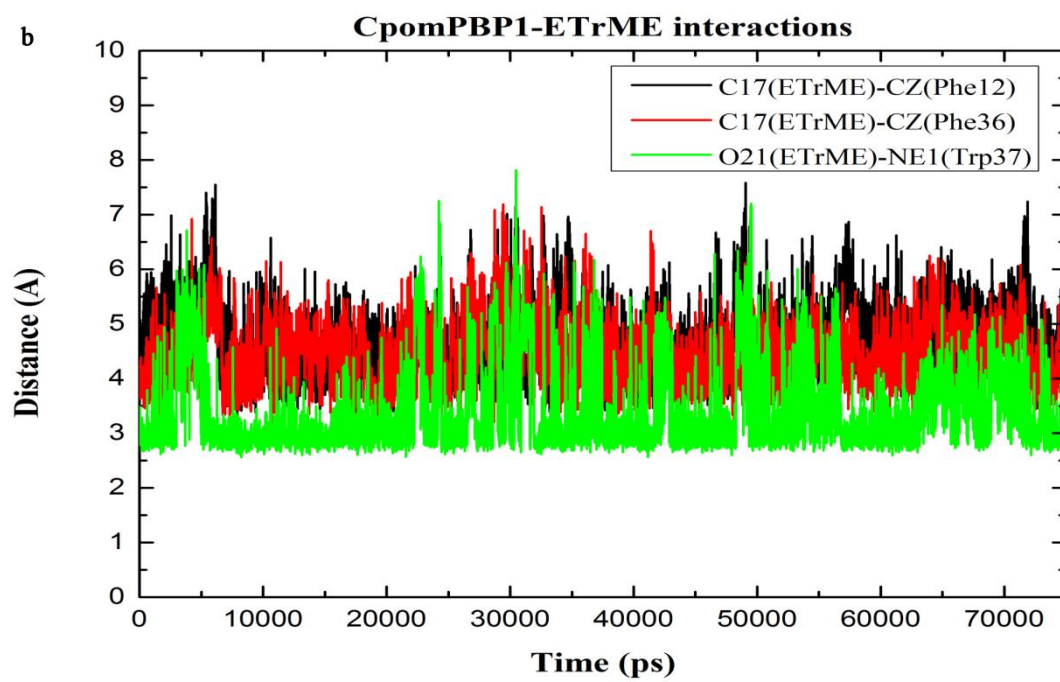

Figure S8

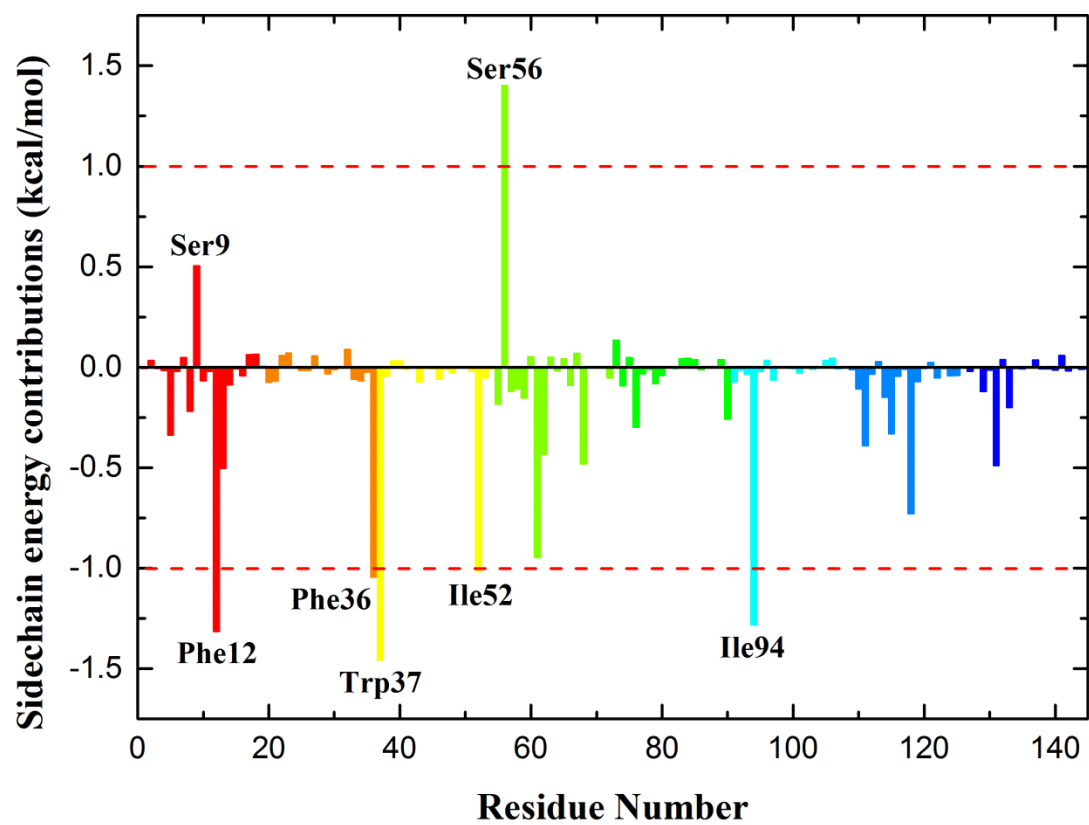



**Figure S9**

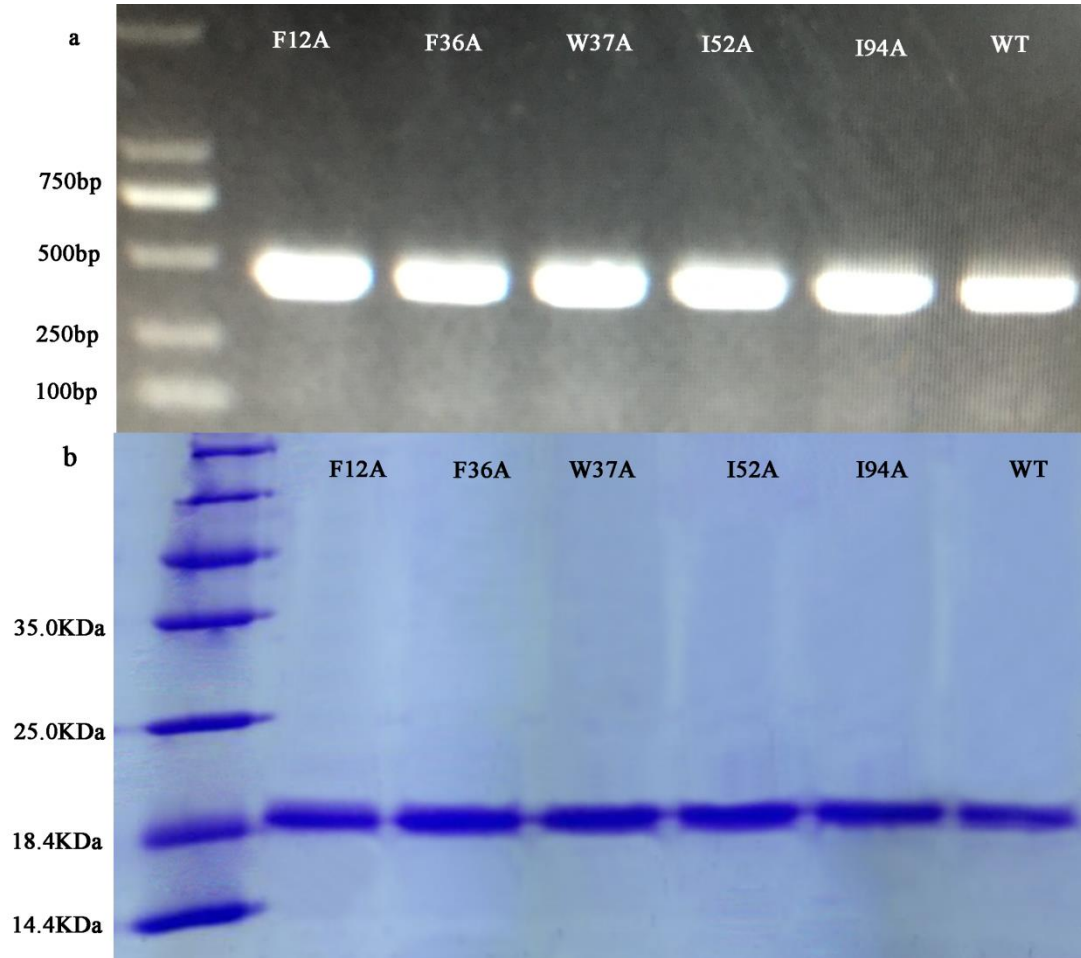

Figure S10

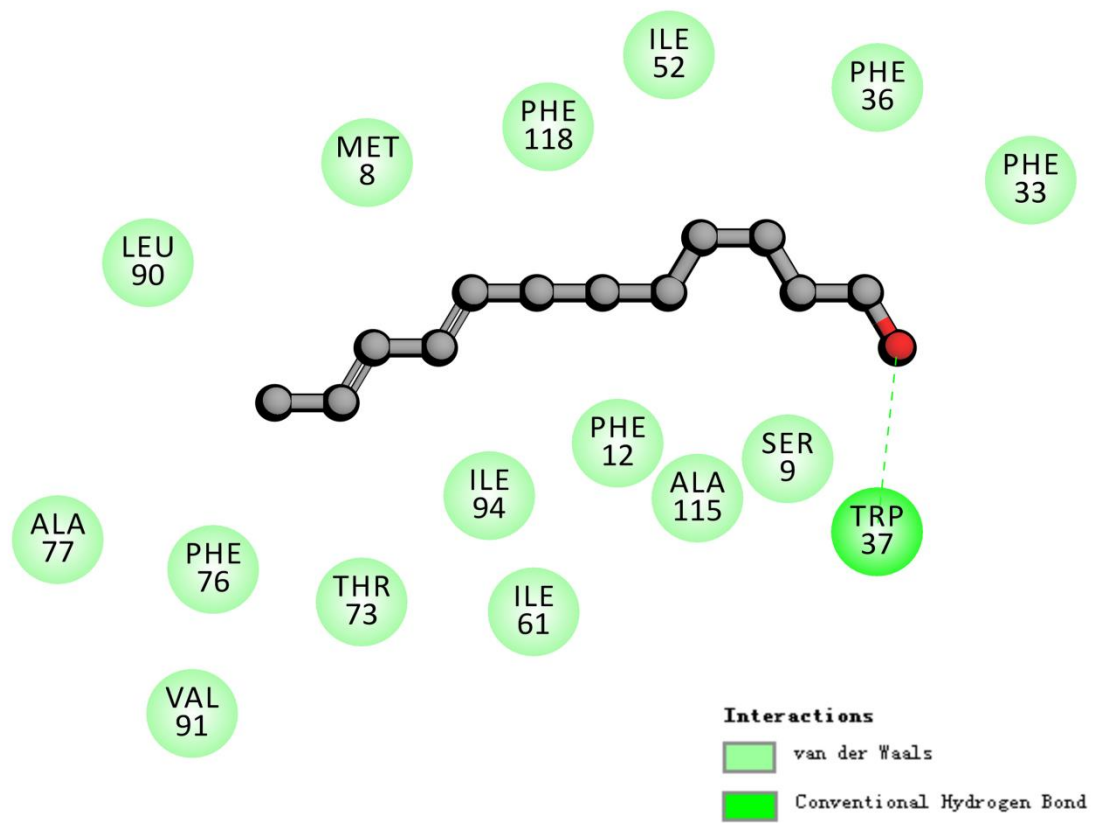

## References

- 1 Šali & Blundell, T. L. Comparative protein modelling by satisfaction of spatial restraints. *J Mol Biol* **234**, 779 (1993).
- 2 Jones, G., Willett, P., Glen, R. C., Leach, A. R. & Taylor, R. Development and validation of a genetic algorithm for flexible docking. *J Mol Biol* **267**, 727-748 (1997).
- 3 Hummer, G., Rasaiah, J. C. & Noworyta, J. P. Water conduction through the hydrophobic channel of a carbon nanotube. *Nature* **414**, 188-190 (2001).
- 4 Wolber, G. & Langer, T. LigandScout: 3-D pharmacophores derived from protein-bound ligands and their use as virtual screening filters. *J Chem Inf Model* **45**, 160-169 (2005).
- 5 Wang, J., Wolf, R. M., Caldwell, J. W., Kollman, P. A. & Case, D. A. Development and testing of a general amber force field. *J Comput Chem* **25**, 1157-1174 (2004).
- 6 Korb, O., Stutzle, T. & Exner, T. E. Empirical scoring functions for advanced protein–ligand docking with PLANTS. *J Chem Inf Model* **49**, 84-96 (2009).
- 7 Liu, J., Yang, X. & Zhang, Y. Characterization of a lambda-cyhalothrin metabolizing glutathione S-transferase CpGSTd1 from *Cydia pomonella* (L.). *Appl Microbiol Biotech* **98**, 8947-8962 (2014).
- 8 Tian, Z., Liu, J. & Zhang, Y. Structural insights into *Cydia pomonella* pheromone binding protein 2 mediated prediction of potentially active semiochemicals. *Sci Rep* **6**, doi:10.1038/srep22336 (2016).
- 9 Kilambi, K. P. & Gray, J. J. Rapid calculation of protein pK(a) values using Rosetta. *Biophys J* **103**, 587-595 (2012).
